# Supplementary material for: Impact of Comprehensive Metabolic Optimization on Myocardial steatosis and Cardiac Remodeling in newly diagnosed type 2 diabetes: a longitudinal study
Source: Research Square preprint supplement (doi:10.21203/rs.3.rs-8097719/v1), 2025-11-26
Supplement: Supplementary file 1 [file 16d3dbbd0ea0042e0cfaeed2.docx]

**Supplementary material**

1. Spearman correlation between longitudinal changes in cardiac, biochemical, and adiposity parameters

| **Cardiac Variables** | **Biochemical/Adiposity variables** | **rho** | **p** |
| --- | --- | --- | --- |
| dLAGLS | dBMI | -0.7815 | <0.001 |
| dLAGLS | dWC | -0.77016 | <0.001 |
| dLAGLS | dALT | -0.66341 | <0.001 |
| dLAGLS | dAST | -0.57746 | 0.007 |
| dLAGLS | dCr | -0.48758 | 0.029 |
| dLAGLS | dFPG | -0.46767 | 0.039 |
| dLAGLS | dTYG | -0.41053 | 0.073 |
| dLAGLS | dLpA | 0.417544 | 0.076 |
| dLAGLS | dRem-C | -0.33233 | 0.152 |
| dLAGLS | dGGT | -0.27625 | 0.238 |
| dLAGLS | dTB | -0.2635 | 0.261 |
| dLAGLS | dTriglycerides | -0.26165 | 0.263 |
| dLAGLS | dApoB | -0.21001 | 0.374 |
| dLAGLS | dAP | -0.14474 | 0.542 |
| dLAGLS | dCRP | -0.13534 | 0.568 |
| dLAGLS | dTotal_Cholesterol | -0.06466 | 0.786 |
| dLAGLS | dLDLc | 0.066667 | 0.786 |
| dLAGLS | dHbA1c | -0.04138 | 0.862 |
| dLAGLS | dHDLc | 0.026339 | 0.914 |
| dLVEDVi | dTYG | -0.6015 | 0.005 |
| dLVEDVi | dTriglycerides | -0.56992 | 0.009 |
| dLVEDVi | dRem-C | -0.50977 | 0.023 |
| dLVEDVi | dWC | -0.50113 | 0.024 |
| dLVEDVi | dFPG | -0.47068 | 0.037 |
| dLVEDVi | dLpA | 0.475439 | 0.041 |
| dLVEDVi | dBMI | -0.43099 | 0.057 |
| dLVEDVi | dALT | -0.3994 | 0.081 |
| dLVEDVi | dAST | -0.3807 | 0.097 |
| dLVEDVi | dHDLc | 0.341528 | 0.152 |
| dLVEDVi | dCr | -0.32731 | 0.158 |
| dLVEDVi | dTotal_Cholesterol | -0.2406 | 0.305 |
| dLVEDVi | dApoB | -0.20474 | 0.386 |
| dLVEDVi | dLDLc | -0.17544 | 0.470 |
| dLVEDVi | dHbA1c | -0.16027 | 0.499 |
| dLVEDVi | dTB | 0.141187 | 0.552 |
| dLVEDVi | dAP | 0.053524 | 0.822 |
| dLVEDVi | dGGT | -0.01807 | 0.939 |
| dLVEDVi | dCRP | -0.01203 | 0.961 |
| dLVEF | dFPG | 0.427068 | 0.061 |
| dLVEF | dTYG | 0.419549 | 0.066 |
| dLVEF | dRem-C | 0.366917 | 0.112 |
| dLVEF | dTriglycerides | 0.360902 | 0.118 |
| dLVEF | dLpA | -0.31754 | 0.184 |
| dLVEF | dHbA1c | 0.238525 | 0.311 |
| dLVEF | dLDLc | 0.238596 | 0.323 |
| dLVEF | dTotal_Cholesterol | 0.222556 | 0.344 |
| dLVEF | dApoB | 0.207753 | 0.379 |
| dLVEF | dALT | 0.200075 | 0.397 |
| dLVEF | dGGT | 0.18216 | 0.442 |
| dLVEF | dWC | 0.133384 | 0.575 |
| dLVEF | dAP | 0.107803 | 0.650 |
| dLVEF | dTB | 0.092866 | 0.696 |
| dLVEF | dAST | 0.032416 | 0.892 |
| dLVEF | dHDLc | -0.03336 | 0.892 |
| dLVEF | dCRP | 0.025564 | 0.916 |
| dLVEF | dBMI | -0.00376 | 0.987 |
| dLVEF | dCr | 0.004515 | 0.984 |
| dLVESVi | dTYG | -0.6 | 0.006 |
| dLVESVi | dTriglycerides | -0.55789 | 0.011 |
| dLVESVi | dFPG | -0.53233 | 0.017 |
| dLVESVi | dRem-c | -0.46917 | 0.038 |
| dLVESVi | dLpA | 0.468421 | 0.044 |
| dLVESVi | dWC | -0.40919 | 0.073 |
| dLVESVi | dALT | -0.4009 | 0.079 |
| dLVESVi | dLDLc | -0.3614 | 0.128 |
| dLVESVi | dTotal_Cholesterol | -0.31429 | 0.176 |
| dLVESVi | dAST | -0.2925 | 0.210 |
| dLVESVi | dApoB | -0.27098 | 0.247 |
| dLVESVi | dBMI | -0.26702 | 0.255 |
| dLVESVi | dCr | -0.2611 | 0.266 |
| dLVESVi | dHDLc | 0.260755 | 0.280 |
| dLVESVi | dHbA1c | -0.22498 | 0.340 |
| dLVESVi | dGGT | -0.20926 | 0.375 |
| dLVESVi | dTB | 0.058136 | 0.807 |
| dLVESVi | dAP | 0.07011 | 0.768 |
| dLVESVi | dCRP | 0.066165 | 0.781 |
| dLVGLS | dBMI | -0.40993 | 0.072 |
| dLVGLS | dGGT | -0.3711 | 0.107 |
| dLVGLS | dCr | -0.34537 | 0.135 |
| dLVGLS | dALT | -0.27379 | 0.242 |
| dLVGLS | dRem-c | -0.27068 | 0.247 |
| dLVGLS | dAST | -0.25933 | 0.269 |
| dLVGLS | dHDLc | 0.228271 | 0.347 |
| dLVGLS | dCRP | -0.21053 | 0.371 |
| dLVGLS | dWC | -0.18915 | 0.424 |
| dLVGLS | dTB | 0.132126 | 0.578 |
| dLVGLS | dApoB | -0.12044 | 0.613 |
| dLVGLS | dFPG | 0.115789 | 0.625 |
| dLVGLS | dTriglycerides | -0.11429 | 0.630 |
| dLVGLS | dAP | 0.051263 | 0.830 |
| dLVGLS | dLDLc | 0.042105 | 0.865 |
| dLVGLS | dLpA | 0.045614 | 0.854 |
| dLVGLS | dTYG | -0.03459 | 0.886 |
| dLVGLS | dTotal_Cholesterol | -0.02857 | 0.906 |
| dLVGLS | dHbA1c | -0.00677 | 0.977 |
| dLVMi | dGGT | -0.32367 | 0.163 |
| dLVMi | dCRP | -0.29925 | 0.199 |
| dLVMi | dHDLc | 0.287972 | 0.231 |
| dLVMi | dRem-c | -0.25714 | 0.272 |
| dLVMi | dHbA1c | -0.17908 | 0.449 |
| dLVMi | dAST | -0.18017 | 0.447 |
| dLVMi | dTriglycerides | -0.17444 | 0.460 |
| dLVMi | dTotal_Cholesterol | -0.14887 | 0.529 |
| dLVMi | dApoB | -0.13775 | 0.562 |
| dLVMi | dTYG | -0.12481 | 0.598 |
| dLVMi | dBMI | -0.10982 | 0.644 |
| dLVMi | dLpA | 0.096491 | 0.694 |
| dLVMi | dCr | -0.06847 | 0.774 |
| dLVMi | dTB | 0.067951 | 0.775 |
| dLVMi | dALT | -0.06544 | 0.784 |
| dLVMi | dAP | 0.067848 | 0.776 |
| dLVMi | dLDLc | -0.03684 | 0.882 |
| dLVMi | dFPG | 0.025564 | 0.916 |
| dLVMi | dWC | -0.01884 | 0.937 |
| dMTGC | dCr | 0.455663 | 0.049 |
| dMTGC | dFPG | 0.42807 | 0.068 |
| dMTGC | dBMI | 0.358929 | 0.131 |
| dMTGC | dWC | 0.349583 | 0.142 |
| dMTGC | dALT | 0.341378 | 0.152 |
| dMTGC | dApoB | 0.299517 | 0.212 |
| dMTGC | dLpA | -0.30857 | 0.212 |
| dMTGC | dHbA1c | 0.262511 | 0.277 |
| dMTGC | dTYG | 0.252632 | 0.295 |
| dMTGC | dCRP | 0.24386 | 0.312 |
| dMTGC | dTriglycerides | 0.221053 | 0.361 |
| dMTGC | dRem-c | 0.203509 | 0.401 |
| dMTGC | dAP | -0.1883 | 0.440 |
| dMTGC | dTotal_Cholesterol | 0.149123 | 0.540 |
| dMTGC | dHDLc | 0.121901 | 0.629 |
| dMTGC | dTB | 0.108419 | 0.658 |
| dMTGC | dGGT | 0.079051 | 0.747 |
| dMTGC | dLDLc | 0.060888 | 0.811 |
| dMTGC | dAST | 0.042179 | 0.863 |
| dRVEDVi | dTYG | -0.67018 | 0.002 |
| dRVEDVi | dTriglycerides | -0.65965 | 0.002 |
| dRVEDVi | dRem-c | -0.65088 | 0.003 |
| dRVEDVi | dVLDLc | -0.65119 | 0.004 |
| dRVEDVi | dFPG | -0.55614 | 0.014 |
| dRVEDVi | dALT | -0.53883 | 0.017 |
| dRVEDVi | dApoB | -0.48924 | 0.033 |
| dRVEDVi | dLDLc | -0.4902 | 0.040 |
| dRVEDVi | dTotal_Cholesterol | -0.45789 | 0.050 |
| dRVEDVi | dWC | -0.44659 | 0.055 |
| dRVEDVi | dHbA1c | -0.3405 | 0.153 |
| dRVEDVi | dLpA | 0.351909 | 0.152 |
| dRVEDVi | dBMI | -0.33787 | 0.157 |
| dRVEDVi | dAST | -0.30959 | 0.197 |
| dRVEDVi | dHDLc | 0.272727 | 0.273 |
| dRVEDVi | dCr | -0.24232 | 0.317 |
| dRVEDVi | dGGT | -0.22661 | 0.350 |
| dRVEDVi | dCRP | -0.22807 | 0.346 |
| dRVEDVi | dAP | -0.06772 | 0.782 |
| dRVEDVi | dTB | 0.033495 | 0.891 |
| dRVEF | dTB | 0.40997 | 0.072 |
| dRVEF | dAP | 0.422919 | 0.063 |
| dRVEF | dHbA1c | 0.282167 | 0.228 |
| dRVEF | dTriglycerides | 0.270677 | 0.247 |
| dRVEF | dFPG | 0.245113 | 0.296 |
| dRVEF | dTYG | 0.239098 | 0.308 |
| dRVEF | dGGT | 0.219797 | 0.351 |
| dRVEF | dLpA | 0.215789 | 0.373 |
| dRVEF | dAST | 0.186959 | 0.429 |
| dRVEF | dRem-c | 0.160902 | 0.496 |
| dRVEF | dWC | -0.13037 | 0.583 |
| dRVEF | dALT | 0.119594 | 0.615 |
| dRVEF | dApoB | 0.112909 | 0.635 |
| dRVEF | dCRP | 0.103759 | 0.662 |
| dRVEF | dBMI | -0.10004 | 0.674 |
| dRVEF | dHDLc | -0.07902 | 0.747 |
| dRVEF | dCr | -0.05794 | 0.808 |
| dRVEF | dLDLc | 0.064912 | 0.792 |
| dRVEF | dTotal_Cholesterol | 0.015038 | 0.951 |
| dRVESVi | dTriglycerides | -0.55789 | 0.014 |
| dRVESVi | dRem-c | -0.5386 | 0.018 |
| dRVESVi | dTYG | -0.54035 | 0.018 |
| dRVESVi | dLDLc | -0.5129 | 0.031 |
| dRVESVi | dApoB | -0.48924 | 0.033 |
| dRVESVi | dFPG | -0.45263 | 0.053 |
| dRVESVi | dTotal_Cholesterol | -0.42982 | 0.067 |
| dRVESVi | dHbA1c | -0.34401 | 0.149 |
| dRVESVi | dCRP | -0.33333 | 0.163 |
| dRVESVi | dALT | -0.30803 | 0.199 |
| dRVESVi | dGGT | -0.29688 | 0.217 |
| dRVESVi | dHDLc | 0.266529 | 0.285 |
| dRVESVi | dTB | -0.2521 | 0.297 |
| dRVESVi | dAST | -0.18118 | 0.457 |
| dRVESVi | dAP | -0.17678 | 0.469 |
| dRVESVi | dWC | -0.08527 | 0.728 |
| dRVESVi | dCr | -0.0597 | 0.808 |
| dRVESVi | dLpA | 0.031992 | 0.901 |
| dRVESVi | dBMI | 0.010531 | 0.965 |
| dRVGLS | dTriglycerides | 0.542857 | 0.014 |
| dRVGLS | dTYG | 0.518797 | 0.020 |
| dRVGLS | dTotal_Cholesterol | 0.511278 | 0.022 |
| dRVGLS | dRem-c | 0.481203 | 0.033 |
| dRVGLS | dApoB | 0.466692 | 0.038 |
| dRVGLS | dLDLc | 0.45614 | 0.051 |
| dRVGLS | dLpA | -0.35614 | 0.134 |
| dRVGLS | dFPG | 0.335338 | 0.148 |
| dRVGLS | dHbA1c | 0.296464 | 0.204 |
| dRVGLS | dAP | 0.290238 | 0.214 |
| dRVGLS | dWC | 0.217785 | 0.356 |
| dRVGLS | dALT | 0.133133 | 0.575 |
| dRVGLS | dTB | 0.123066 | 0.605 |
| dRVGLS | dCRP | 0.111278 | 0.639 |
| dRVGLS | dHDLc | -0.09394 | 0.702 |
| dRVGLS | dGGT | 0.05796 | 0.808 |
| dRVGLS | dBMI | 0.036104 | 0.879 |
| dRVGLS | dAST | 0.005277 | 0.982 |
| dRVGLS | dCr | 0.001505 | 0.994 |
